# Supplementary material for: Low resistance to chytridiomycosis in direct-developing amphibians
Source: PubMed Central journal article supplement (PMC5709405; doi:10.1038/s41598-017-16425-y), 2017-11-30
Supplement: 41598_2017_16425_MOESM1_ESM.pdf [file 41598_2017_16425_MOESM1_ESM.pdf]

# **Low resistance to chytridiomycosis in direct-developing amphibians**

**Andréa F. C. Mesquita<sup>1</sup>, Carolina Lambertini<sup>2</sup>, Mariana Lyra<sup>1</sup>,  
Leo R. Malagoli<sup>1</sup>, Timothy Y. James<sup>3</sup>, Luís Felipe Toledo<sup>2</sup>,  
Célio F. B. Haddad<sup>1</sup>, C. Guilherme Becker\*<sup>4</sup>**

<sup>1</sup> Universidade Estadual Paulista (UNESP), Instituto de Biociências, Departamento de Zoologia, and Centro de Aquicultura (CAUNESP), 13506-900 Rio Claro, SP, Brazil

<sup>2</sup> Departamento de Biologia Animal, I.B., Universidade Estadual de Campinas, 13083-862 Campinas, SP, Brazil

<sup>3</sup> Department of Ecology and Evolutionary Biology, University of Michigan, 48109, Ann Arbor, MI, U.S.A.

<sup>4</sup> Department of Biological Sciences, The University of Alabama, 35487 Tuscaloosa, AL, U.S.A.

**Corresponding author:**

C. Guilherme Becker

\*cgbecker1@ua.edu

## Supplementary Table S1

**Table S1.** GLMM testing the effect of host life history on gain in *Bd* load during the experiment. Day of swab included as fixed effect and species included as random effect.

| Parameter    | d.f. (den) | t    | P      |
|--------------|------------|------|--------|
| Intercept    | 22.73      | 1.23 | 0.231  |
| Life history | 3.925      | -4.3 | 0.013* |
| Day of swab  | 53.55      | 1.99 | 0.051  |

Random effect of species accounted for 47.32%

## Supplementary Photo S1

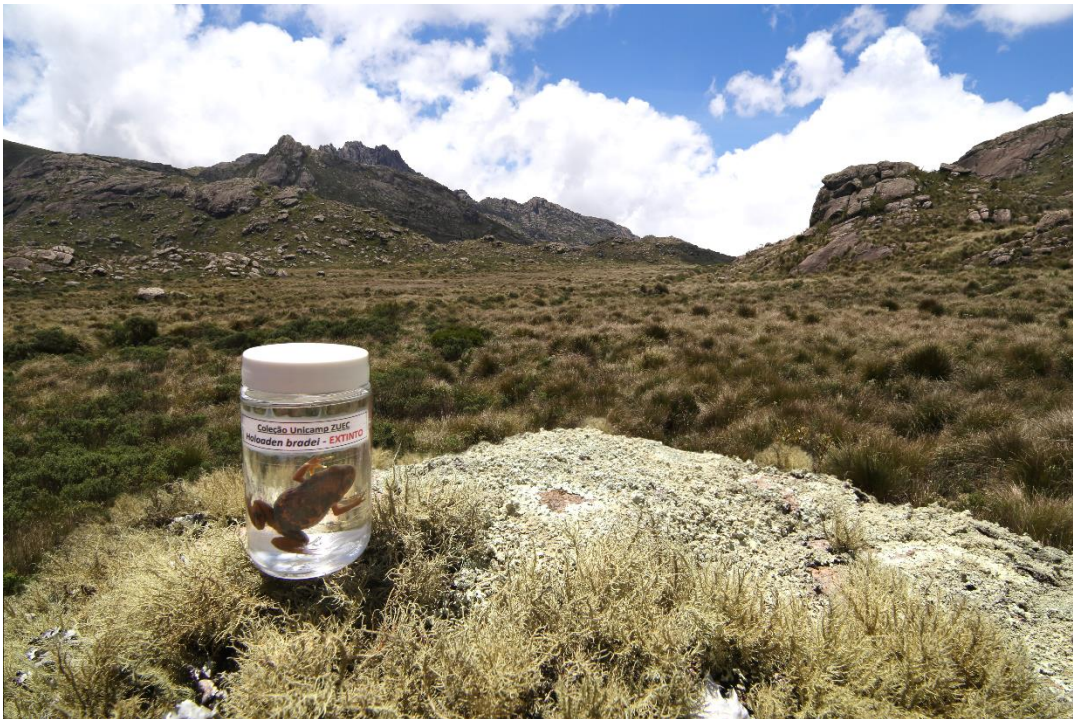

**Photo S1.** Specimen of the endemic direct-developing frog *Holoaden bradei* (Craugastoridae), last seen in the wild in 1978 and presumably extinct due to chytridiomycosis<sup>18</sup>. Die-offs were never seen at the high elevation quotas of Parque Nacional do Itatiaia, Brazil's Atlantic forest.
